# Supplementary material for: Orthogonal navigation of multiple visible-light-driven artificial microswimmers
Source: PubMed Central journal article supplement (PMC5681650; doi:10.1038/s41467-017-01778-9), 2017-11-10
Supplement: 41467_2017_1778_MOESM1_ESM.pdf [file 41467_2017_1778_MOESM1_ESM.pdf]

1

| Parameters         | Meaning                                | Value                                                            |
|--------------------|----------------------------------------|------------------------------------------------------------------|
| $D_1$              | H <sup>+</sup> diffusion coefficient   | $9.31 \times 10^{-5}$ [cm <sup>2</sup> ·s <sup>-1</sup> ]        |
| $D_2$              | OH <sup>-</sup> diffusion coefficient  | $5.03 \times 10^{-5}$ [cm <sup>2</sup> ·s <sup>-1</sup> ]        |
| $D_3$              | H <sub>2</sub> O Diffusion coefficient | $2.26 \times 10^{-5}$ [cm <sup>2</sup> ·s <sup>-1</sup> ]        |
| $F_c$              | Cathode OH <sup>-</sup> flux           | $1.90 \times 10^{-3}$<br>[mol·m <sup>-2</sup> ·s <sup>-1</sup> ] |
| $F_a$              | Anode H <sup>+</sup> flux              | $6.25 \times 10^{-3}$<br>[mol·m <sup>-2</sup> ·s <sup>-1</sup> ] |
| $L_{\text{TiO}_2}$ | Length of TiO <sub>2</sub> head        | 4 [μm]                                                           |
| $d_{\text{TiO}_2}$ | Diameter of TiO <sub>2</sub> head      | 3 [μm]                                                           |
| $L_{\text{Si}}$    | Length of Si trunk                     | 6 [μm]                                                           |
| $d_{\text{Si}}$    | Diameter of Si trunk                   | 0.8 [μm]                                                         |

2 **Supplementary Table 1. Typical parameters used in the simulation.**

3

4

5

6

7

8

9

10

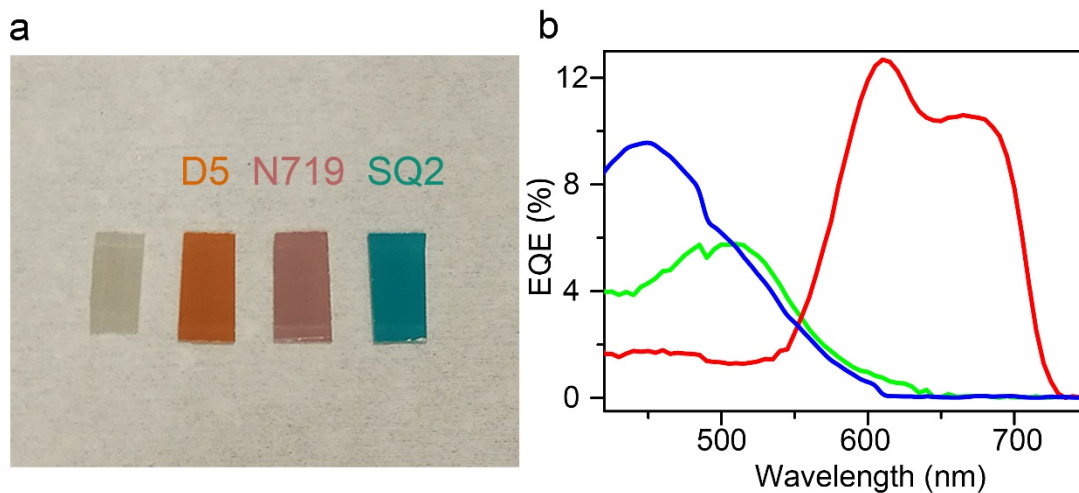

11  
 12 **Supplementary Figure 1. a.** The photograph of pristine and dye-sensitized TiO<sub>2</sub>/FTO samples. **b.**  
 13 The external quantum efficiency (EQE) of the nanowire-based dye-sensitized solar cells (D5  
 14 (blue), N719 (green) and SQ2 (red)).

15

16

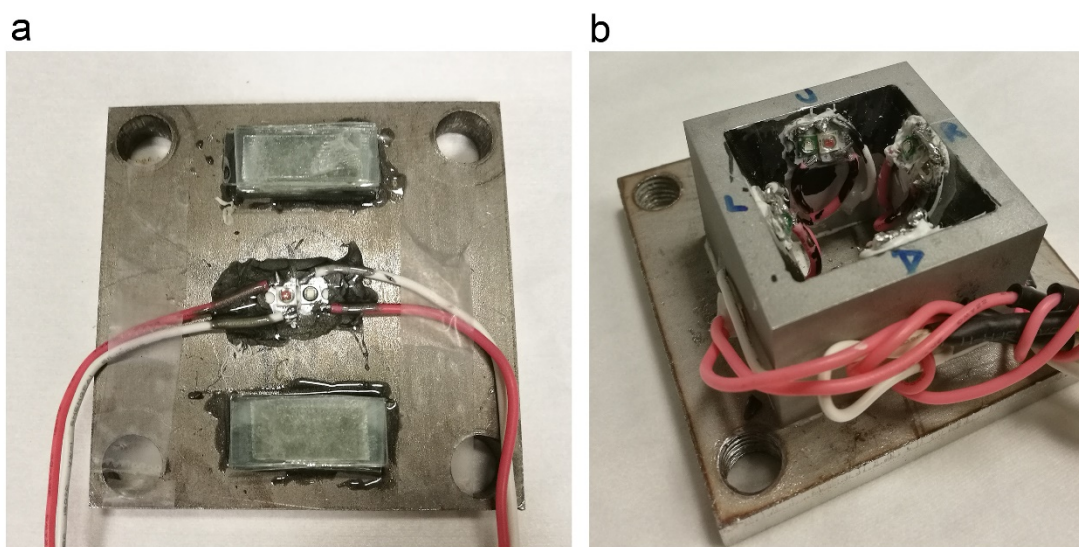

17

18 **Supplementary Figure 2. a.** The customized stage for intensity-dependent speed measurement  
 19 and multi-channels light manipulation. **b.** Stage with independently controllable red and blue  
 20 LEDs over orthogonal directions.

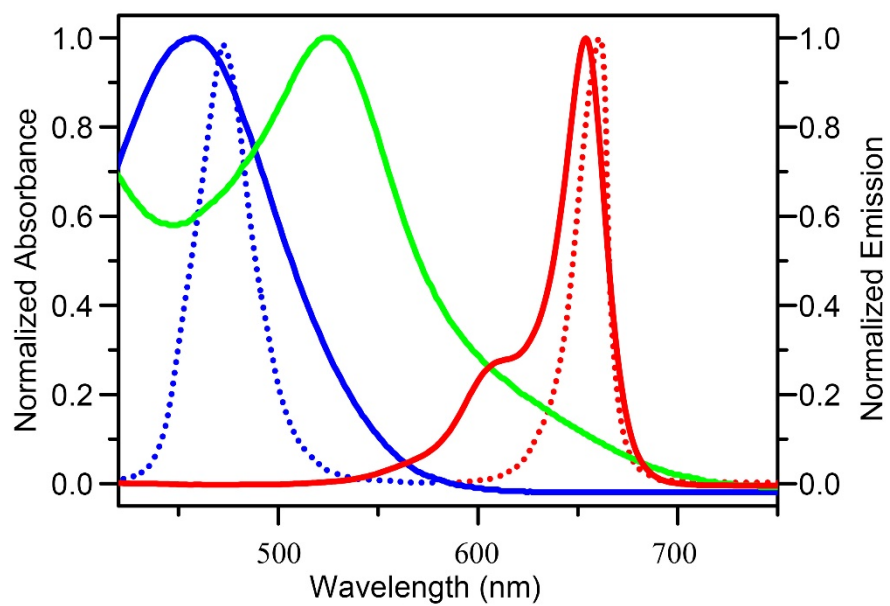

21

22 **Supplementary Figure 3.** The normalized absorbance of ethanolic solution of dye (D5 (blue),  
23 N719 (green) and SQ2 (red)). The dotted curve indicated the normalized emission spectra of LED  
24 (475 nm (blue), 660 nm (red)).
